# Supplementary material for: Bloodstream Infection among Adults in Phnom Penh, Cambodia: Key Pathogens and Resistance Patterns
Source: PLOS journal article supplement (doi:10.1371/journal.pone.0059775), 2013-03-29
Supplement: S3 (10.1371/journal.pone.0059775.s003) [file journal.pone.0059775.s003]

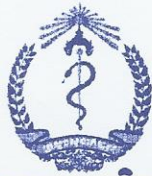

ក្រសួងសុខាភិបាល

MINISTRY OF HEALTH

គណៈកម្មាធិការជាតិក្រុមសីលធម៌

សំរាប់ការស្រាវជ្រាវសុខភាពដែលទាក់ទងនឹងមនុស្ស

National Ethics Committee for Health Research

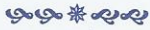

លេខ...០៧/NECHR

ព្រះរាជាណាចក្រកម្ពុជា  
KINGDOM OF CAMBODIA  
ជាតិ សាសនា ព្រះមហាក្សត្រ  
NATION RELIGION KING

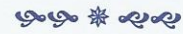

រាជធានីភ្នំពេញ, ថ្ងៃទី ១០ ខែ ០៧ ឆ្នាំ ២០១២

**Dr. Phe Thong**

**Project:** Request for continuation and amendment of the protocol entitled “Surveillance of antimicrobial resistance among consecutive culture isolates in tropical settings. Version N° 2.0, dated 20<sup>th</sup> January, 2012”

**Reference:** 17<sup>th</sup> February, 2012 NECHR meeting minute

Dear Dr. Phe Thong,

I am pleased to inform you that your request for continuation and amendment of your study protocol entitled “Surveillance of antimicrobial resistance among consecutive culture isolates in tropical settings. Version N° 2.0, dated 20<sup>th</sup> January, 2012” has been approved by National Ethic Committee for Health Research (NECHR) in the meeting on 17<sup>th</sup> February, 2012. This approval is valid for twelve months after the approval date.

The Principal Investigator of the project shall submit following document to the committee’s secretariat at the National Institute of Public Health at #2 Kim Il Sung Blvd, Khan Tuol Kok, Phnom Penh. (Tel: 855-23-880345, Fax: 855-23-881949):

- Annual progress report
- Final scientific report
- Patient/participant feedback (if any)
- Analyzing serious adverse events report (if applicable)

The Principal Investigator should be aware that there might be site monitoring visits at any time from NECHR team during the project implementation and should provide full cooperation to the team. *SL*

Regards,

Chairman

**Prof. ENG HUOT**
